# Supplementary material for: Telomere as a Therapeutic Target in Dedifferentiated Liposarcoma
Source: MDPI journal article supplement (doi:10.3390/cancers14112624), 2022-05-25
Supplement: s1 [file s1]

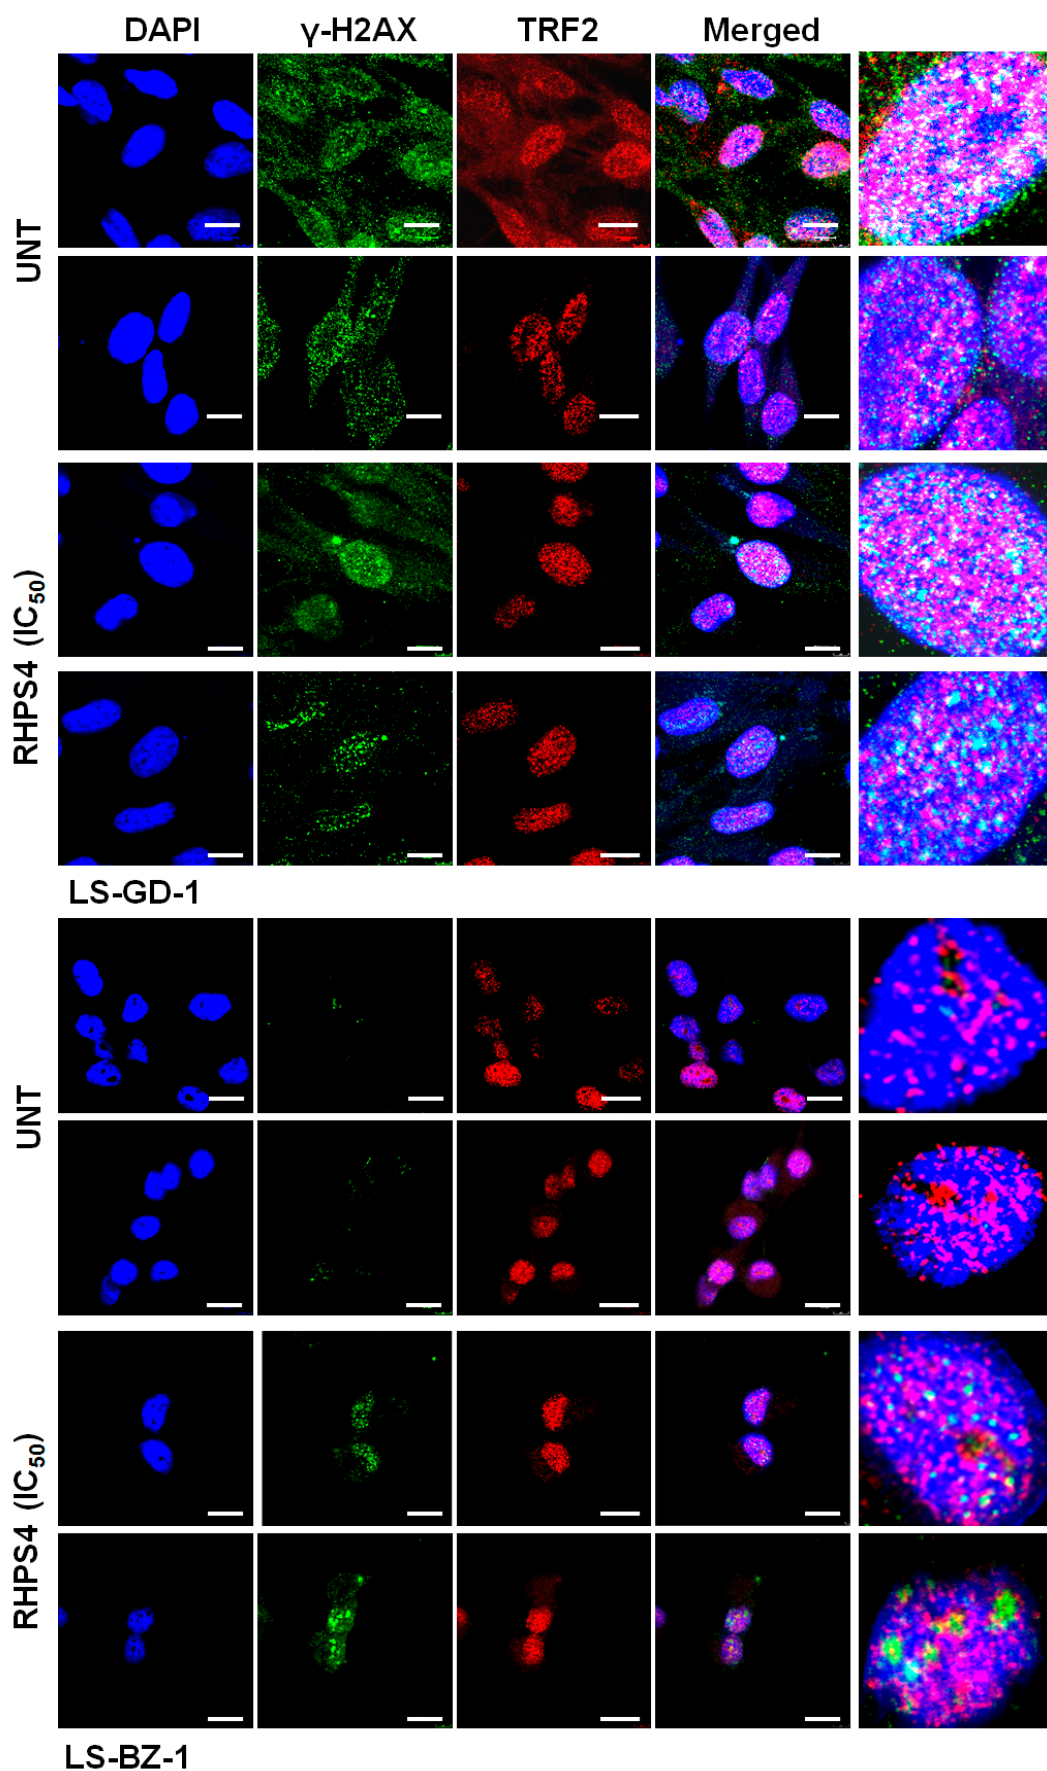

**Figure S1. DDLPS cells exposed to RHPS4 are characterized by DNA damage.** Representative photomicrographs showing untreated and RHPS4-treated DDLPS cells probed with anti- $\gamma$ -H2AX (green signal) and anti-TRF2 (red signal) antibodies. Nuclei were counterstained with DAPI (blue). Magnification

×63, scale bars:10 μm. The zoomed images on the right highlights the co-localization signal between γ-H2AX and TRF2 (yellow).
