# Supplementary material for: Telomere as a Therapeutic Target in Dedifferentiated Liposarcoma
Source: MDPI journal article supplement (doi:10.3390/cancers14112624), 2022-05-25
Supplement: s1 [file s1]

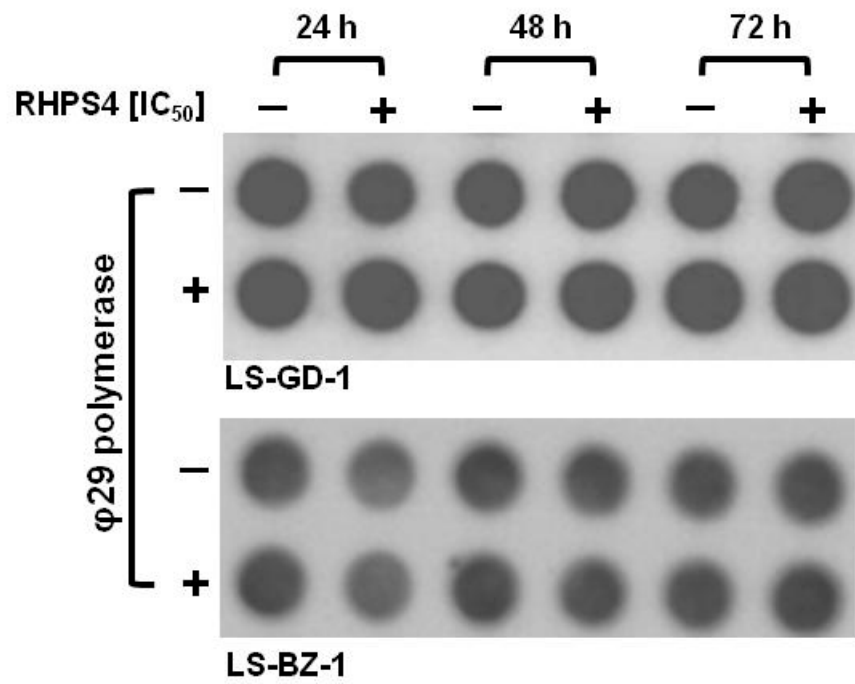

**Figure S2. Hybridization of a CCA dot blot with an Alu probe.** Representative image of a dot blot showing the re-probing of a CCA filter with a <sup>32</sup>P-labelled Alu probe to ensure for equal sample loading.
