# Supplementary material for: Telomere as a Therapeutic Target in Dedifferentiated Liposarcoma
Source: MDPI journal article supplement (doi:10.3390/cancers14112624), 2022-05-25
Supplement: s1 [file s1]

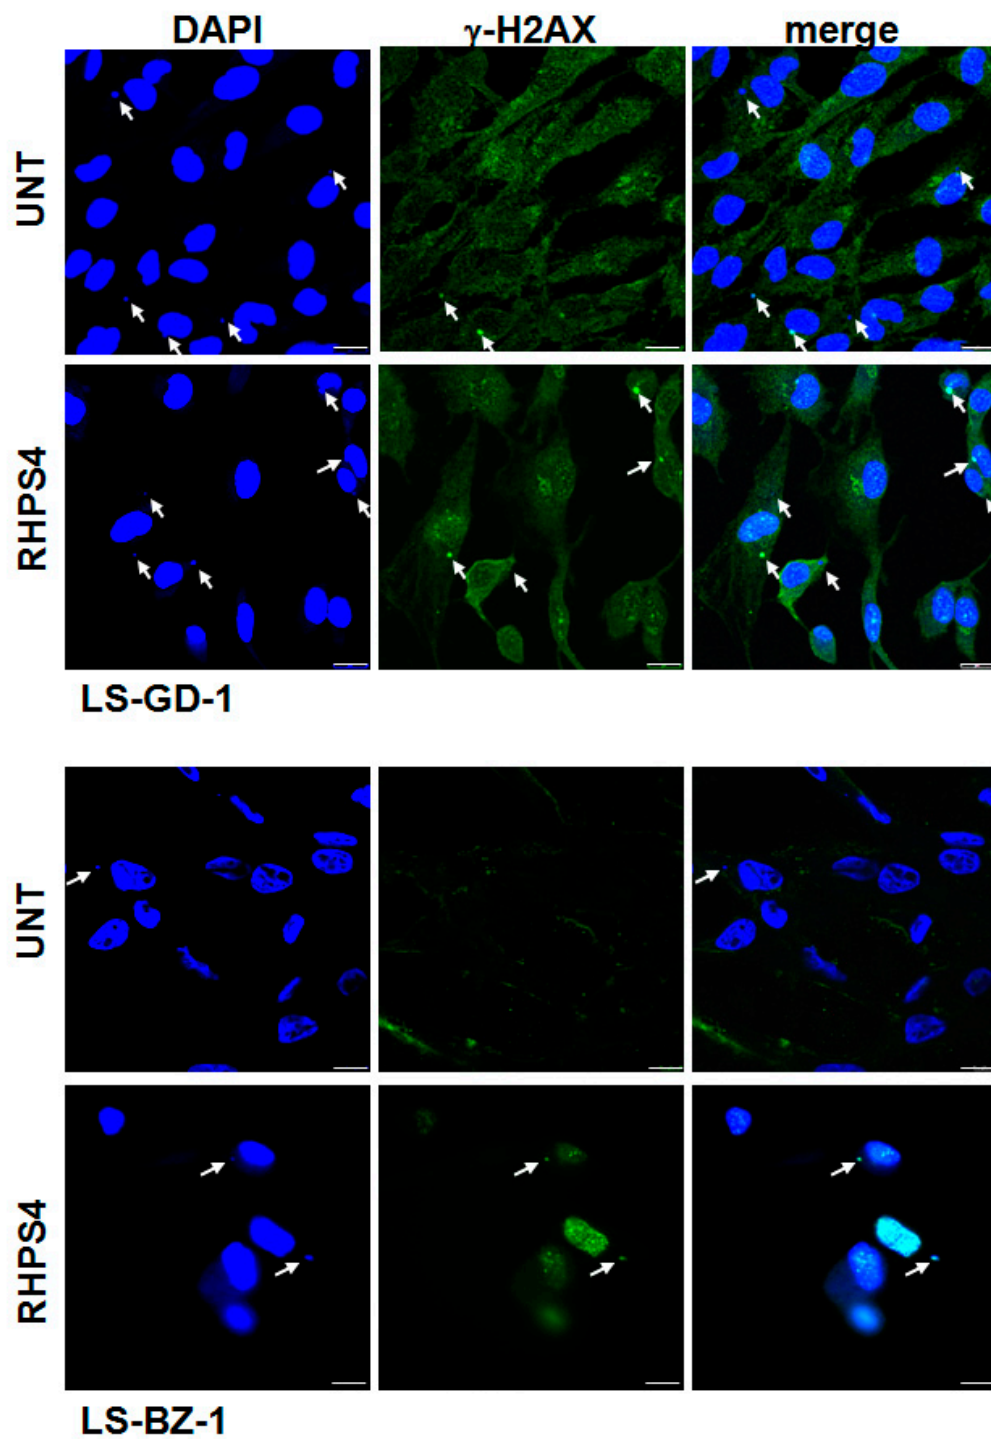

**Figure S3. DDLPS cells exposed to RHPs4 are characterized by micronuclei accumulation.** Representative immunofluorescence photomicrographs of RHPs4-treated and untreated LS-GD-1 and LS-BZ-1 cells probed with an anti- $\gamma$ -H2AX antibody (green). Nuclei were counterstained with DAPI (blue). White arrowheads indicate DAPI- and  $\gamma$ -H2AX-stained micronuclei. Magnification  $\times 40$ ; Scale bar: 20  $\mu$ m.
