# Supplementary material for: Telomere as a Therapeutic Target in Dedifferentiated Liposarcoma
Source: Cancers (Basel). 2022 May 25;14(11):2624. doi: 10.3390/cancers14112624 (PMC9179266; doi:10.3390/cancers14112624)
Supplement: Supplementary file 1 [file cancers-14-02624-s001.zip]

Archive with 5 entries (5 files):
- Figure S1.pdf
- Figure S2.pdf
- Figure S3.pdf
- File S1.pdf
- Table S1.xlsx
