# Supplementary material for: Telomere as a Therapeutic Target in Dedifferentiated Liposarcoma
Source: Cancers (Basel). 2022 May 25;14(11):2624. doi: 10.3390/cancers14112624 (PMC9179266; doi:10.3390/cancers14112624)
Supplement: Supplementary file 1 [file cancers-14-02624-s001.zip › Table S1.xlsx]

## Sheet: Sheet1
Table S1. Annotation clusters of significantly over-represented pathways in DD vs. WD comparison.
name	DD vs. WD	color legend	label	REACTOME ID	link	C	O	E	R	pValue	FDR	overlap	genes
Cell Cycle, Mitotic	up	light green	cell cycle	R-HSA-69278	http://reactome.org/PathwayBrowser/#/R-HSA-69278	528	97	18.5129	5.23959	0	0	97	GINS1;HIST1H2BB;CENPK;HIST1H2AE;DBF4;HIST2H2BE;HIST1H2AJ;KIF23;FOXM1;GINS2;HIST1H2BL;HIST1H2BD;GINS4;HIST1H2BG;RFC4;SGO1;CDC20;CENPF;CDC6;HIST1H2AB;CENPM;PLK1;UBE2C;CDCA8;ZWINT;CCNA2;HAUS5;PLK4;TPX2;RFC3;CDK4;PTTG1;HIST1H2BH;NDC80;CCNB2;CDCA5;PRIM2;TOP2A;HIST1H2BE;HIST1H3G;CEP41;KIF20A;CDKN2A;RBL1;HIST3H2BB;HIST1H2BF;RRM2;CENPP;CEP152;POLA2;HIST2H3A;CENPQ;AURKB;CENPO;CDC25B;HIST1H2BC;MCM4;MAD2L1;…
Cell Cycle	up	light green	cell cycle	R-HSA-1640170	http://reactome.org/PathwayBrowser/#/R-HSA-1640170	633	113	22.1944	5.09137	0	0	113	GINS1;HIST1H2BB;CENPK;HIST1H2AE;DBF4;HIST2H2BE;HIST1H2AJ;KIF23;FOXM1;GINS2;HIST1H2BL;HIST1H2BD;GINS4;HIST1H2BG;CHEK1;RFC4;WRAP53;SGO1;MDM2;CDC20;CENPF;CDC6;RMI2;HIST1H2AB;CENPM;PLK1;UBE2C;CDCA8;ZWINT;CHEK2;CCNA2;HAUS5;PLK4;TPX2;RFC3;CDK4;BRCA2;PTTG1;HIST1H2BH;NDC80;CCNB2;CDCA5;HJURP;PRIM2;TOP2A;HIST1H2BE;HIST1H3G;CEP41;KIF20A;CDKN2A;RBL1;HIST3H2BB;HIST1H2BF;RRM2;CENPP;BRIP1;CEP152;POLA2;HIST2H3A;…
M Phase	up	light green	cell cycle	R-HSA-68886	http://reactome.org/PathwayBrowser/#/R-HSA-68886	385	67	13.499	4.96334	0	0	67	HIST1H2BB;CENPK;HIST1H2AE;HIST2H2BE;HIST1H2AJ;KIF23;HIST1H2BL;HIST1H2BD;HIST1H2BG;SGO1;CDC20;CENPF;HIST1H2AB;CENPM;PLK1;UBE2C;CDCA8;ZWINT;HAUS5;PLK4;PTTG1;HIST1H2BH;NDC80;CCNB2;CDCA5;HIST1H2BE;HIST1H3G;CEP41;KIF20A;HIST3H2BB;HIST1H2BF;CENPP;CEP152;HIST2H3A;CENPQ;AURKB;CENPO;HIST1H2BC;MAD2L1;SMC4;CEP135;HIST2H2AA4;CDK1;CCNB1;NUF2;RCC2;SPDL1;BUB1B;HIST1H3I;NUP93;CENPU;LMNB1;HIST1H3F;HIST1H2BM;HIST1…
DNA Repair	up	dark green	DNA repair	R-HSA-73894	http://reactome.org/PathwayBrowser/#/R-HSA-73894	309	46	10.8343	4.24579	0	0	46	UBE2T;POLQ;HIST1H2BB;HIST2H2BE;HIST1H2BL;HIST1H2BD;HIST1H2BG;DTL;CHEK1;RFC4;RAD51AP1;RMI2;CHEK2;CCNA2;RFC3;BRCA2;HIST1H2BH;XRCC2;HIST1H2BE;HIST3H2BB;HIST1H2BF;BRIP1;RMI1;HIST1H2BC;RAD51;TOPBP1;BARD1;PCLAF;FANCD2;RAD9A;HIST1H2BM;HIST1H2BK;ERCC3;HIST1H4D;DCLRE1C;FANCB;BRCA1;CLSPN;DCLRE1A;HIST1H2BJ;FAAP24;FEN1;FANCC;RAD18;TDP1;ERCC2
Cell Cycle Checkpoints	up	light green	cell cycle	R-HSA-69620	http://reactome.org/PathwayBrowser/#/R-HSA-69620	288	65	10.0979	6.43695	0	0	65	HIST1H2BB;CENPK;DBF4;HIST2H2BE;HIST1H2BL;HIST1H2BD;HIST1H2BG;CHEK1;RFC4;SGO1;MDM2;CDC20;CENPF;CDC6;RMI2;CENPM;PLK1;UBE2C;CDCA8;ZWINT;CHEK2;CCNA2;RFC3;HIST1H2BH;NDC80;CCNB2;HIST1H2BE;CDKN2A;HIST3H2BB;HIST1H2BF;CENPP;BRIP1;CENPQ;AURKB;CENPO;RMI1;HIST1H2BC;MCM4;MAD2L1;MCM8;MCM2;CDK1;TOPBP1;CCNB1;BARD1;NUF2;RCC2;SPDL1;BUB1B;RAD9A;MCM5;CENPU;HIST1H2BM;HIST1H2BK;HIST1H4D;CDC7;BRCA1;GTSE1;CLSPN;HIST1H2B…
G2/M Checkpoints	up	light green	cell cycle	R-HSA-69481	http://reactome.org/PathwayBrowser/#/R-HSA-69481	166	38	5.82034	6.52883	0	0	38	HIST1H2BB;DBF4;HIST2H2BE;HIST1H2BL;HIST1H2BD;HIST1H2BG;CHEK1;RFC4;CDC6;RMI2;CHEK2;RFC3;HIST1H2BH;CCNB2;HIST1H2BE;HIST3H2BB;HIST1H2BF;BRIP1;RMI1;HIST1H2BC;MCM4;MCM8;MCM2;CDK1;TOPBP1;CCNB1;BARD1;RAD9A;MCM5;HIST1H2BM;HIST1H2BK;HIST1H4D;CDC7;BRCA1;GTSE1;CLSPN;HIST1H2BJ;CDC25C
DNA Double-Strand Break Repair	up	dark green	DNA repair	R-HSA-5693532	http://reactome.org/PathwayBrowser/#/R-HSA-5693532	161	35	5.64503	6.20014	0	0	35	POLQ;HIST1H2BB;HIST2H2BE;HIST1H2BL;HIST1H2BD;HIST1H2BG;CHEK1;RFC4;RAD51AP1;RMI2;CHEK2;CCNA2;RFC3;BRCA2;HIST1H2BH;XRCC2;HIST1H2BE;HIST3H2BB;HIST1H2BF;BRIP1;RMI1;HIST1H2BC;RAD51;TOPBP1;BARD1;RAD9A;HIST1H2BM;HIST1H2BK;HIST1H4D;DCLRE1C;BRCA1;CLSPN;HIST1H2BJ;FEN1;TDP1
Epigenetic regulation of gene expression	up	aquamarine	epigenetic regulation	R-HSA-212165	http://reactome.org/PathwayBrowser/#/R-HSA-212165	143	32	5.01391	6.38225	0	0	32	HIST1H2BB;HIST1H2AE;HIST2H2BE;HIST1H2AJ;HIST1H2BL;HIST1H2BD;HIST1H2BG;HIST1H2AB;DNMT1;HIST1H2BH;HIST1H2BE;HIST1H3G;HIST3H2BB;HIST1H2BF;HIST2H3A;HIST1H2BC;HIST2H2AA4;HIST1H3I;HDAC2;HIST1H3F;HIST1H2BM;HIST1H2BK;ERCC3;HIST1H4D;HIST1H2BJ;HIST1H3B;DNMT3B;HIST2H2AA3;UHRF1;PHF19;EZH2;ERCC2
HATs acetylate histones	up	aquamarine	epigenetic regulation	R-HSA-3214847	http://reactome.org/PathwayBrowser/#/R-HSA-3214847	137	33	4.80354	6.86994	0	0	33	HIST1H2AI;HIST1H2BB;HIST1H2AE;HIST2H2BE;HIST1H2AJ;HIST1H2BL;HIST1H2BD;HIST1H2BG;HIST1H2AB;HIST1H2AH;HIST1H2BH;HIST1H2AM;HIST1H2AL;HIST1H2BE;HIST3H2A;HIST1H3G;HIST3H2BB;HIST1H2BF;HIST2H3A;HIST1H2AG;HIST1H2BC;HIST2H2AA4;HIST2H2BF;HIST1H2AK;HIST1H3I;HIST1H3F;HIST1H2BM;HIST1H2BK;HIST1H4D;HIST1H2BJ;HIST1H3B;HIST2H2AA3;HIST2H2AB
Mitotic Prophase	up	light green	cell cycle	R-HSA-68875	http://reactome.org/PathwayBrowser/#/R-HSA-68875	135	33	4.73341	6.97172	0	0	33	HIST1H2BB;HIST1H2AE;HIST2H2BE;HIST1H2AJ;HIST1H2BL;HIST1H2BD;HIST1H2BG;HIST1H2AB;PLK1;HIST1H2BH;CCNB2;HIST1H2BE;HIST1H3G;HIST3H2BB;HIST1H2BF;HIST2H3A;HIST1H2BC;SMC4;HIST2H2AA4;CDK1;CCNB1;HIST1H3I;NUP93;LMNB1;HIST1H3F;HIST1H2BM;HIST1H2BK;HIST1H4D;HIST1H2BJ;NUP37;HIST1H3B;HIST2H2AA3;SMC2
Homology Directed Repair	up	dark green	DNA repair	R-HSA-5693538	http://reactome.org/PathwayBrowser/#/R-HSA-5693538	133	32	4.66329	6.86211	0	0	32	POLQ;HIST1H2BB;HIST2H2BE;HIST1H2BL;HIST1H2BD;HIST1H2BG;CHEK1;RFC4;RAD51AP1;RMI2;CCNA2;RFC3;BRCA2;HIST1H2BH;XRCC2;HIST1H2BE;HIST3H2BB;HIST1H2BF;BRIP1;RMI1;HIST1H2BC;RAD51;TOPBP1;BARD1;RAD9A;HIST1H2BM;HIST1H2BK;HIST1H4D;BRCA1;CLSPN;HIST1H2BJ;FEN1
HDR through Homologous Recombination (HRR) or Single Strand Annealing (SSA)	up	dark green	DNA repair	R-HSA-5693567	http://reactome.org/PathwayBrowser/#/R-HSA-5693567	127	30	4.45291	6.73716	0	0	30	HIST1H2BB;HIST2H2BE;HIST1H2BL;HIST1H2BD;HIST1H2BG;CHEK1;RFC4;RAD51AP1;RMI2;CCNA2;RFC3;BRCA2;HIST1H2BH;XRCC2;HIST1H2BE;HIST3H2BB;HIST1H2BF;BRIP1;RMI1;HIST1H2BC;RAD51;TOPBP1;BARD1;RAD9A;HIST1H2BM;HIST1H2BK;HIST1H4D;BRCA1;CLSPN;HIST1H2BJ
HDACs deacetylate histones	up	aquamarine	epigenetic regulation	R-HSA-3214815	http://reactome.org/PathwayBrowser/#/R-HSA-3214815	90	34	3.15561	10.7745	0	0	34	HIST1H2AI;HIST1H2BB;HIST1H2AE;HIST2H2BE;HIST1H2AJ;HIST1H2BL;HIST1H2BD;HIST1H2BG;HIST1H2AB;HIST1H2AH;HIST1H2BH;HIST1H2AM;HIST1H2AL;HIST1H2BE;HIST3H2A;HIST1H3G;HIST3H2BB;HIST1H2BF;HIST2H3A;HIST1H2AG;HIST1H2BC;HIST2H2AA4;HIST2H2BF;HIST1H2AK;HIST1H3I;HDAC2;HIST1H3F;HIST1H2BM;HIST1H2BK;HIST1H4D;HIST1H2BJ;HIST1H3B;HIST2H2AA3;HIST2H2AB
Telomere Maintenance	up	yellow	telomere maintenance	R-HSA-157579	http://reactome.org/PathwayBrowser/#/R-HSA-157579	79	26	2.76992	9.38655	0	0	26	HIST1H2BB;HIST1H2AE;HIST2H2BE;HIST1H2AJ;HIST1H2BL;HIST1H2BD;HIST1H2BG;RFC4;WRAP53;HIST1H2AB;RFC3;HIST1H2BH;PRIM2;HIST1H2BE;HIST3H2BB;HIST1H2BF;POLA2;HIST1H2BC;HIST2H2AA4;HIST1H2BM;HIST1H2BK;ACD;HIST1H4D;HIST1H2BJ;HIST2H2AA3;FEN1
Condensation of Prophase Chromosomes	up	light green	cell cycle	R-HSA-2299718	http://reactome.org/PathwayBrowser/#/R-HSA-2299718	69	29	2.4193	11.9869	0	0	29	HIST1H2BB;HIST1H2AE;HIST2H2BE;HIST1H2AJ;HIST1H2BL;HIST1H2BD;HIST1H2BG;HIST1H2AB;PLK1;HIST1H2BH;HIST1H2BE;HIST1H3G;HIST3H2BB;HIST1H2BF;HIST2H3A;HIST1H2BC;SMC4;HIST2H2AA4;CDK1;CCNB1;HIST1H3I;HIST1H3F;HIST1H2BM;HIST1H2BK;HIST1H4D;HIST1H2BJ;HIST1H3B;HIST2H2AA3;SMC2
PRC2 methylates histones and DNA	up	aquamarine	epigenetic regulation	R-HSA-212300	http://reactome.org/PathwayBrowser/#/R-HSA-212300	68	28	2.38424	11.7438	0	0	28	HIST1H2BB;HIST1H2AE;HIST2H2BE;HIST1H2AJ;HIST1H2BL;HIST1H2BD;HIST1H2BG;HIST1H2AB;DNMT1;HIST1H2BH;HIST1H2BE;HIST1H3G;HIST3H2BB;HIST1H2BF;HIST2H3A;HIST1H2BC;HIST2H2AA4;HIST1H3I;HIST1H3F;HIST1H2BM;HIST1H2BK;HIST1H4D;HIST1H2BJ;HIST1H3B;DNMT3B;HIST2H2AA3;PHF19;EZH2
DNA methylation	up	aquamarine	epigenetic regulation	R-HSA-5334118	http://reactome.org/PathwayBrowser/#/R-HSA-5334118	60	27	2.10374	12.8343	0	0	27	HIST1H2BB;HIST1H2AE;HIST2H2BE;HIST1H2AJ;HIST1H2BL;HIST1H2BD;HIST1H2BG;HIST1H2AB;DNMT1;HIST1H2BH;HIST1H2BE;HIST1H3G;HIST3H2BB;HIST1H2BF;HIST2H3A;HIST1H2BC;HIST2H2AA4;HIST1H3I;HIST1H3F;HIST1H2BM;HIST1H2BK;HIST1H4D;HIST1H2BJ;HIST1H3B;DNMT3B;HIST2H2AA3;UHRF1
Mitotic Prometaphase	up	light green	cell cycle	R-HSA-68877	http://reactome.org/PathwayBrowser/#/R-HSA-68877	195	36	6.83715	5.26535	1.11022e-16	4.78229e-15	36	CENPK;SGO1;CDC20;CENPF;CENPM;PLK1;CDCA8;ZWINT;HAUS5;PLK4;NDC80;CCNB2;CDCA5;CEP41;CENPP;CEP152;CENPQ;AURKB;CENPO;MAD2L1;SMC4;CEP135;CDK1;CCNB1;NUF2;RCC2;SPDL1;BUB1B;CENPU;NUP37;KIF18A;CEP78;CENPI;TUBB3;SMC2;SFI1
Processing of DNA double-strand break ends	up	dark green	DNA repair	R-HSA-5693607	http://reactome.org/PathwayBrowser/#/R-HSA-5693607	95	26	3.33092	7.80565	1.11022e-16	4.78229e-15	26	HIST1H2BB;HIST2H2BE;HIST1H2BL;HIST1H2BD;HIST1H2BG;CHEK1;RFC4;RMI2;CCNA2;RFC3;HIST1H2BH;HIST1H2BE;HIST3H2BB;HIST1H2BF;BRIP1;RMI1;HIST1H2BC;TOPBP1;BARD1;RAD9A;HIST1H2BM;HIST1H2BK;HIST1H4D;BRCA1;CLSPN;HIST1H2BJ
Positive epigenetic regulation of rRNA expression	up	aquamarine	epigenetic regulation	R-HSA-5250913	http://reactome.org/PathwayBrowser/#/R-HSA-5250913	101	25	3.54129	7.05957	5.21805e-15	1.83484e-13	25	HIST1H2BB;HIST1H2AE;HIST2H2BE;HIST1H2AJ;HIST1H2BL;HIST1H2BD;HIST1H2BG;HIST1H2AB;HIST1H2BH;HIST1H2BE;HIST1H3G;HIST3H2BB;HIST1H2BF;HIST2H3A;HIST1H2BC;HIST2H2AA4;HIST1H3I;HDAC2;HIST1H3F;HIST1H2BM;HIST1H2BK;HIST1H4D;HIST1H2BJ;HIST1H3B;HIST2H2AA3
Resolution of Sister Chromatid Cohesion	up	light green	cell cycle	R-HSA-2500257	http://reactome.org/PathwayBrowser/#/R-HSA-2500257	121	27	4.24254	6.36411	6.66134e-15	2.25049e-13	27	CENPK;SGO1;CDC20;CENPF;CENPM;PLK1;CDCA8;ZWINT;NDC80;CCNB2;CDCA5;CENPP;CENPQ;AURKB;CENPO;MAD2L1;CDK1;CCNB1;NUF2;RCC2;SPDL1;BUB1B;CENPU;NUP37;KIF18A;CENPI;TUBB3
Gene Silencing by RNA	up	aquamarine	epigenetic regulation	R-HSA-211000	http://reactome.org/PathwayBrowser/#/R-HSA-211000	125	26	4.38279	5.9323	1.27232e-13	3.84596e-12	26	HIST1H2BB;HIST1H2AE;HIST2H2BE;HIST1H2AJ;HIST1H2BL;HIST1H2BD;HIST1H2BG;HIST1H2AB;HIST1H2BH;HIST1H2BE;HIST1H3G;HIST3H2BB;HIST1H2BF;HIST2H3A;HIST1H2BC;HIST2H2AA4;HIST1H3I;NUP93;HIST1H3F;HIST1H2BM;HIST1H2BK;HIST1H4D;HIST1H2BJ;NUP37;HIST1H3B;HIST2H2AA3
Chromatin modifying enzymes	up	aquamarine	epigenetic regulation	R-HSA-3247509	http://reactome.org/PathwayBrowser/#/R-HSA-3247509	270	38	9.46682	4.01402	1.51434e-13	4.4224e-12	38	HIST1H2AI;HIST1H2BB;HIST1H2AE;HIST2H2BE;HIST1H2AJ;HIST1H2BL;HIST1H2BD;HIST1H2BG;HIST1H2AB;SMYD3;CDK4;HIST1H2AH;KDM2B;HIST1H2BH;HIST1H2AM;HIST1H2AL;HIST1H2BE;HIST3H2A;HIST1H3G;HIST3H2BB;HIST1H2BF;HIST2H3A;HIST1H2AG;HIST1H2BC;HIST2H2AA4;HIST2H2BF;HIST1H2AK;HIST1H3I;HDAC2;HIST1H3F;HIST1H2BM;HIST1H2BK;HIST1H4D;HIST1H2BJ;HIST1H3B;HIST2H2AA3;HIST2H2AB;EZH2
Chromatin organization	up	light green	cell cycle	R-HSA-4839726	http://reactome.org/PathwayBrowser/#/R-HSA-4839726	270	38	9.46682	4.01402	1.51434e-13	4.4224e-12	38	HIST1H2AI;HIST1H2BB;HIST1H2AE;HIST2H2BE;HIST1H2AJ;HIST1H2BL;HIST1H2BD;HIST1H2BG;HIST1H2AB;SMYD3;CDK4;HIST1H2AH;KDM2B;HIST1H2BH;HIST1H2AM;HIST1H2AL;HIST1H2BE;HIST3H2A;HIST1H3G;HIST3H2BB;HIST1H2BF;HIST2H3A;HIST1H2AG;HIST1H2BC;HIST2H2AA4;HIST2H2BF;HIST1H2AK;HIST1H3I;HDAC2;HIST1H3F;HIST1H2BM;HIST1H2BK;HIST1H4D;HIST1H2BJ;HIST1H3B;HIST2H2AA3;HIST2H2AB;EZH2
RMTs methylate histone arginines	up	aquamarine	epigenetic regulation	R-HSA-3214858	http://reactome.org/PathwayBrowser/#/R-HSA-3214858	76	20	2.66473	7.50544	8.49432e-13	2.28683e-11	20	HIST1H2AI;HIST1H2AE;HIST1H2AJ;HIST1H2AB;CDK4;HIST1H2AH;HIST1H2AM;HIST1H2AL;HIST3H2A;HIST1H3G;HIST2H3A;HIST1H2AG;HIST2H2AA4;HIST1H2AK;HIST1H3I;HIST1H3F;HIST1H4D;HIST1H3B;HIST2H2AA3;HIST2H2AB
Mitotic Spindle Checkpoint	up	light green	cell cycle	R-HSA-69618	http://reactome.org/PathwayBrowser/#/R-HSA-69618	109	23	3.82179	6.01812	2.49356e-12	6.60985e-11	23	CENPK;SGO1;CDC20;CENPF;CENPM;PLK1;UBE2C;CDCA8;ZWINT;NDC80;CENPP;CENPQ;AURKB;CENPO;MAD2L1;NUF2;RCC2;SPDL1;BUB1B;CENPU;NUP37;KIF18A;CENPI
Nonhomologous End-Joining (NHEJ)	up	dark green	DNA repair	R-HSA-5693571	http://reactome.org/PathwayBrowser/#/R-HSA-5693571	67	18	2.34917	7.66227	8.22609e-12	2.14751e-10	18	HIST1H2BB;HIST2H2BE;HIST1H2BL;HIST1H2BD;HIST1H2BG;HIST1H2BH;HIST1H2BE;HIST3H2BB;HIST1H2BF;HIST1H2BC;BARD1;HIST1H2BM;HIST1H2BK;HIST1H4D;DCLRE1C;BRCA1;HIST1H2BJ;TDP1
Homologous DNA Pairing and Strand Exchange	up	dark green	DNA repair	R-HSA-5693579	http://reactome.org/PathwayBrowser/#/R-HSA-5693579	42	14	1.47262	9.50689	7.16982e-11	1.73994e-09	14	CHEK1;RFC4;RAD51AP1;RMI2;RFC3;BRCA2;XRCC2;BRIP1;RMI1;RAD51;TOPBP1;BARD1;RAD9A;BRCA1
Mitotic Metaphase and Anaphase	up	light green	cell cycle	R-HSA-2555396	http://reactome.org/PathwayBrowser/#/R-HSA-2555396	197	28	6.90727	4.0537	2.22441e-10	5.25021e-09	28	CENPK;SGO1;CDC20;CENPF;CENPM;PLK1;UBE2C;CDCA8;ZWINT;PTTG1;NDC80;CDCA5;CENPP;CENPQ;AURKB;CENPO;MAD2L1;NUF2;RCC2;SPDL1;BUB1B;CENPU;LMNB1;NUP37;FBXO5;KIF18A;CENPI;TUBB3
DNA strand elongation	up	dark green	DNA repair	R-HSA-69190	http://reactome.org/PathwayBrowser/#/R-HSA-69190	32	12	1.12199	10.6952	3.45578e-10	7.98851e-09	12	GINS1;GINS2;GINS4;RFC4;RFC3;PRIM2;POLA2;MCM4;MCM8;MCM2;MCM5;FEN1
Recruitment and ATM-mediated phosphorylation of repair and signaling proteins at DNA double strand breaks	up	dark green	DNA repair	R-HSA-5693565	http://reactome.org/PathwayBrowser/#/R-HSA-5693565	74	17	2.59461	6.55204	4.66226e-10	1.05698e-08	17	HIST1H2BB;HIST2H2BE;HIST1H2BL;HIST1H2BD;HIST1H2BG;CHEK2;HIST1H2BH;HIST1H2BE;HIST3H2BB;HIST1H2BF;HIST1H2BC;BARD1;HIST1H2BM;HIST1H2BK;HIST1H4D;BRCA1;HIST1H2BJ
DNA Double Strand Break Response	up	dark green	DNA repair	R-HSA-5693606	http://reactome.org/PathwayBrowser/#/R-HSA-5693606	75	17	2.62967	6.46468	5.8384e-10	1.30644e-08	17	HIST1H2BB;HIST2H2BE;HIST1H2BL;HIST1H2BD;HIST1H2BG;CHEK2;HIST1H2BH;HIST1H2BE;HIST3H2BB;HIST1H2BF;HIST1H2BC;BARD1;HIST1H2BM;HIST1H2BK;HIST1H4D;BRCA1;HIST1H2BJ
Mitotic Anaphase	up	light green	cell cycle	R-HSA-68882	http://reactome.org/PathwayBrowser/#/R-HSA-68882	196	27	6.87221	3.92887	9.64712e-10	2.13102e-08	27	CENPK;SGO1;CDC20;CENPF;CENPM;PLK1;UBE2C;CDCA8;ZWINT;PTTG1;NDC80;CDCA5;CENPP;CENPQ;AURKB;CENPO;MAD2L1;NUF2;RCC2;SPDL1;BUB1B;CENPU;LMNB1;NUP37;KIF18A;CENPI;TUBB3
TCF dependent signaling in response to WNT	up	red	WNT signaling	R-HSA-201681	http://reactome.org/PathwayBrowser/#/R-HSA-201681	228	27	7.9942	3.37745	2.69474e-08	5.33682e-07	27	HIST1H2BB;HIST1H2AE;HIST2H2BE;HIST1H2AJ;HIST1H2BL;HIST1H2BD;WNT5A;HIST1H2BG;HIST1H2AB;HIST1H2BH;HIST1H2BE;HIST1H3G;HIST3H2BB;HIST1H2BF;HIST2H3A;HIST1H2BC;HIST2H2AA4;HIST1H3I;HIST1H3F;HIST1H2BM;HIST1H2BK;HIST1H4D;HIST1H2BJ;HIST1H3B;HIST2H2AA3;SOX9;MEN1
HDR through Homologous Recombination (HRR)	up	dark green	DNA repair	R-HSA-5685942	http://reactome.org/PathwayBrowser/#/R-HSA-5685942	65	14	2.27905	6.14291	3.96953e-08	7.68483e-07	14	CHEK1;RFC4;RAD51AP1;RMI2;RFC3;BRCA2;XRCC2;BRIP1;RMI1;RAD51;TOPBP1;BARD1;RAD9A;BRCA1
Mitotic G1-G1/S phases	up	light green	cell cycle	R-HSA-453279	http://reactome.org/PathwayBrowser/#/R-HSA-453279	149	20	5.22428	3.82828	2.34765e-07	4.34946e-06	20	DBF4;CDC6;CCNA2;CDK4;PRIM2;TOP2A;CDKN2A;RBL1;RRM2;POLA2;MCM4;MCM8;MYBL2;MCM2;CDK1;CCNB1;MCM5;CDC7;FBXO5;CCNE1
DNA Replication	up	light green	cell cycle	R-HSA-69306	http://reactome.org/PathwayBrowser/#/R-HSA-69306	127	18	4.45291	4.0423	4.17105e-07	7.40898e-06	18	GINS1;DBF4;GINS2;GINS4;RFC4;CDC6;UBE2C;CCNA2;RFC3;PRIM2;POLA2;MCM4;MCM8;MCM2;MCM5;CDC7;CCNE1;FEN1
Polo-like kinase mediated events	up	light green	cell cycle	R-HSA-156711	http://reactome.org/PathwayBrowser/#/R-HSA-156711	16	7	0.560997	12.4778	5.35334e-07	9.31697e-06	7	FOXM1;CENPF;PLK1;CCNB2;MYBL2;CCNB1;CDC25C
TP53 Regulates Transcription of Cell Cycle Genes	up	light green	cell cycle	R-HSA-6791312	http://reactome.org/PathwayBrowser/#/R-HSA-6791312	49	11	1.71805	6.4026	7.44571e-07	1.24553e-05	11	E2F7;CCNA2;E2F8;PLK2;RBL1;CDK1;CCNB1;AURKA;BAX;CDC25C;CCNE1
S Phase	up	light green	cell cycle	R-HSA-69242	http://reactome.org/PathwayBrowser/#/R-HSA-69242	161	20	5.64503	3.54294	8.33911e-07	1.38157e-05	20	GINS1;GINS2;GINS4;RFC4;CDC6;UBE2C;CCNA2;RFC3;CDK4;CDCA5;PRIM2;POLA2;CDC25B;MCM4;MCM8;MCM2;MCM5;ESCO2;CCNE1;FEN1
Cyclin A/B1/B2 associated events during G2/M transition	up	light green	cell cycle	R-HSA-69273	http://reactome.org/PathwayBrowser/#/R-HSA-69273	25	8	0.876558	9.12661	1.3555e-06	2.18274e-05	8	FOXM1;PLK1;CCNA2;CCNB2;CDC25B;CDK1;CCNB1;CDC25C
G1/S Transition	up	light green	cell cycle	R-HSA-69206	http://reactome.org/PathwayBrowser/#/R-HSA-69206	131	17	4.59316	3.70115	3.06123e-06	4.8838e-05	17	DBF4;CDC6;CCNA2;CDK4;PRIM2;RBL1;RRM2;POLA2;MCM4;MCM8;MCM2;CDK1;CCNB1;MCM5;CDC7;FBXO5;CCNE1
Synthesis of DNA	up	light green	cell cycle	R-HSA-69239	http://reactome.org/PathwayBrowser/#/R-HSA-69239	119	16	4.17241	3.83471	3.7443e-06	5.82902e-05	16	GINS1;GINS2;GINS4;RFC4;CDC6;UBE2C;CCNA2;RFC3;PRIM2;POLA2;MCM4;MCM8;MCM2;MCM5;CCNE1;FEN1
G2/M Transition	up	light green	cell cycle	R-HSA-69275	http://reactome.org/PathwayBrowser/#/R-HSA-69275	194	21	6.80209	3.08729	4.24195e-06	6.52579e-05	21	FOXM1;CENPF;PLK1;CCNA2;HAUS5;PLK4;TPX2;CCNB2;CEP41;CEP152;CDC25B;CEP135;MYBL2;CDK1;CCNB1;AURKA;GTSE1;CDC25C;CEP78;TUBB3;SFI1
Mitotic G2-G2/M phases	up	light green	cell cycle	R-HSA-453274	http://reactome.org/PathwayBrowser/#/R-HSA-453274	196	21	6.87221	3.05579	4.99305e-06	7.54652e-05	21	FOXM1;CENPF;PLK1;CCNA2;HAUS5;PLK4;TPX2;CCNB2;CEP41;CEP152;CDC25B;CEP135;MYBL2;CDK1;CCNB1;AURKA;GTSE1;CDC25C;CEP78;TUBB3;SFI1
Signaling by WNT	up	red	WNT signaling	R-HSA-195721	http://reactome.org/PathwayBrowser/#/R-HSA-195721	321	28	11.255	2.48778	7.97824e-06	0.000119535	28	HIST1H2BB;HIST1H2AE;HIST2H2BE;HIST1H2AJ;HIST1H2BL;HIST1H2BD;WNT5A;HIST1H2BG;HIST1H2AB;HIST1H2BH;HIST1H2BE;HIST1H3G;HIST3H2BB;HIST1H2BF;HIST2H3A;HIST1H2BC;HIST2H2AA4;HIST1H3I;HIST1H3F;HIST1H2BM;HIST1H2BK;HIST1H4D;HIST1H2BJ;HIST1H3B;HIST2H2AA3;SOX9;GNG4;MEN1
Condensation of Prometaphase Chromosomes	up	light green	cell cycle	R-HSA-2514853	http://reactome.org/PathwayBrowser/#/R-HSA-2514853	11	5	0.385685	12.9639	2.00065e-05	0.000294625	5	CCNB2;SMC4;CDK1;CCNB1;SMC2
G0 and Early G1	up	light green	cell cycle	R-HSA-1538133	http://reactome.org/PathwayBrowser/#/R-HSA-1538133	27	7	0.946682	7.39425	2.97487e-05	0.000430732	7	CDC6;CCNA2;TOP2A;RBL1;MYBL2;CDK1;CCNE1
Regulation of mitotic cell cycle	up	light green	cell cycle	R-HSA-453276	http://reactome.org/PathwayBrowser/#/R-HSA-453276	86	12	3.01536	3.97963	4.23809e-05	0.00060349	12	CDC20;PLK1;UBE2C;CCNA2;PTTG1;AURKB;MAD2L1;CDK1;CCNB1;AURKA;BUB1B;FBXO5
AURKA Activation by TPX2	up	light green	cell cycle	R-HSA-8854518	http://reactome.org/PathwayBrowser/#/R-HSA-8854518	73	11	2.55955	4.29763	4.27659e-05	0.00060398	11	PLK1;HAUS5;PLK4;TPX2;CEP41;CEP152;CEP135;CDK1;AURKA;CEP78;SFI1
Regulation of PLK1 Activity at G2/M Transition	up	light green	cell cycle	R-HSA-2565942	http://reactome.org/PathwayBrowser/#/R-HSA-2565942	88	12	3.08548	3.88918	5.34487e-05	0.000736736	12	PLK1;HAUS5;PLK4;CCNB2;CEP41;CEP152;CEP135;CDK1;CCNB1;AURKA;CEP78;SFI1
Activation of E2F1 target genes at G1/S	up	light green	cell cycle	R-HSA-539107	http://reactome.org/PathwayBrowser/#/R-HSA-539107	28	6	0.981744	6.11157	0.000348831	0.0046592	6	CDC6;RBL1;RRM2;CDK1;FBXO5;CCNE1
G1/S-Specific Transcription	up	light green	cell cycle	R-HSA-69205	http://reactome.org/PathwayBrowser/#/R-HSA-69205	28	6	0.981744	6.11157	0.000348831	0.0046592	6	CDC6;RBL1;RRM2;CDK1;FBXO5;CCNE1
G2/M DNA replication checkpoint	up	light green	cell cycle	R-HSA-69478	http://reactome.org/PathwayBrowser/#/R-HSA-69478	5	3	0.175312	17.1124	0.000405611	0.00537591	3	CCNB2;CDK1;CCNB1
Extension of Telomeres	up	yellow	telomere maintenance	R-HSA-180786	http://reactome.org/PathwayBrowser/#/R-HSA-180786	30	6	1.05187	5.70413	0.000518172	0.00671286	6	RFC4;WRAP53;RFC3;PRIM2;POLA2;FEN1
E2F mediated regulation of DNA replication	up	light green	cell cycle	R-HSA-113510	http://reactome.org/PathwayBrowser/#/R-HSA-113510	22	5	0.771371	6.48197	0.000828961	0.0104255	5	PRIM2;POLA2;MCM8;CDK1;CCNB1
Telomere C-strand (Lagging Strand) Synthesis	up	yellow	telomere maintenance	R-HSA-174417	http://reactome.org/PathwayBrowser/#/R-HSA-174417	24	5	0.841495	5.9418	0.001263	0.0150079	5	RFC4;RFC3;PRIM2;POLA2;FEN1
Regulation of APC/C activators between G1/S and early anaphase	up	light green	cell cycle	R-HSA-176408	http://reactome.org/PathwayBrowser/#/R-HSA-176408	80	9	2.80498	3.20857	0.00186958	0.0209174	9	CDC20;PLK1;UBE2C;CCNA2;MAD2L1;CDK1;CCNB1;BUB1B;FBXO5
Recruitment of mitotic centrosome proteins and complexes	up	light green	cell cycle	R-HSA-380270	http://reactome.org/PathwayBrowser/#/R-HSA-380270	82	9	2.87511	3.13032	0.00222231	0.0242345	9	PLK1;HAUS5;PLK4;CEP41;CEP152;CEP135;CDK1;CEP78;SFI1
PKMTs methylate histone lysines	up	aquamarine	epigenetic regulation	R-HSA-3214841	http://reactome.org/PathwayBrowser/#/R-HSA-3214841	69	8	2.4193	3.30674	0.00273267	0.0296125	8	SMYD3;HIST1H3G;HIST2H3A;HIST1H3I;HIST1H3F;HIST1H4D;HIST1H3B;EZH2
DNA Replication Pre-Initiation	up	light green	cell cycle	R-HSA-69002	http://reactome.org/PathwayBrowser/#/R-HSA-69002	85	9	2.9803	3.01983	0.00284867	0.0306766	9	DBF4;CDC6;PRIM2;POLA2;MCM4;MCM8;MCM2;MCM5;CDC7
E2F-enabled inhibition of pre-replication complex formation	up	light green	cell cycle	R-HSA-113507	http://reactome.org/PathwayBrowser/#/R-HSA-113507	9	3	0.315561	9.50689	0.00306726	0.0326228	3	MCM8;CDK1;CCNB1
Fatty acid metabolism	down	blue	lipid metabolism	R-HSA-8978868	http://reactome.org/PathwayBrowser/#/R-HSA-8978868	175	28	9.55037	2.93182	2.46624e-07	0.000117168	28	ACACB;ACSL1;THRSP;CYP4B1;ACSL5;HADH;HADHA;PRKAG2;ACADVL;FASN;SLC25A20;ECHS1;ACOT2;ELOVL7;PCTP;SLC27A2;ACAA2;HSD17B8;HADHB;SCD;ACADM;CYP1B1;ACOT1;ACBD5;AKR1C3;HSD17B4;MLYCD;ACADS
Metabolism of lipids	down	blue	lipid metabolism	R-HSA-556833	http://reactome.org/PathwayBrowser/#/R-HSA-556833	726	77	39.6204	1.94344	7.97573e-09	1.37422e-05	77	FABP4;ACACB;PLIN1;PIK3R3;CD36;MTMR12;CIDEC;CAV1;ACSL1;GPAM;LIPE;GPD1;FABP5;PNPLA2;G0S2;PLA2G16;BMX;PPARG;THRSP;ESYT1;CIDEA;DGAT1;CYP4B1;ACSL5;HADH;GPAT3;OSBPL1A;ACER2;PTEN;HADHA;PRKAG2;MGLL;AGPAT2;ACADVL;FASN;AKR1C2;SLC25A20;ECHS1;ACOT2;ASAH1;MTMR10;PIK3C2A;ABHD5;ACER3;GDPD5;ACAT1;ELOVL7;PCTP;SLC27A2;ORMDL3;CHKA;AKR1C1;HRASLS5;DGAT2;ANGPTL4;PLIN2;ACAA2;PCYT1A;HSD17B8;HADHB;SCD;CRLS1;LPIN1;ACADM;S…
Mitochondrial fatty acid beta-oxidation of saturated fatty acids	down	blue	lipid metabolism	R-HSA-77286	http://reactome.org/PathwayBrowser/#/R-HSA-77286	11	7	0.600309	11.6607	3.78598e-07	0.000117168	7	HADH;HADHA;ACADVL;ECHS1;HADHB;ACADM;ACADS
Beta oxidation of octanoyl-CoA to hexanoyl-CoA	down	blue	lipid metabolism	R-HSA-77348	http://reactome.org/PathwayBrowser/#/R-HSA-77348	5	5	0.272868	18.3239	4.76018e-07	0.000117168	5	HADH;HADHA;ECHS1;HADHB;ACADM
Beta oxidation of hexanoyl-CoA to butanoyl-CoA	down	blue	lipid metabolism	R-HSA-77350	http://reactome.org/PathwayBrowser/#/R-HSA-77350	5	5	0.272868	18.3239	4.76018e-07	0.000117168	5	HADH;HADHA;ECHS1;HADHB;ACADS
Mitochondrial Fatty Acid Beta-Oxidation	down	blue	lipid metabolism	R-HSA-77289	http://reactome.org/PathwayBrowser/#/R-HSA-77289	36	11	1.96465	5.59897	1.99803e-06	0.000382512	11	HADH;HADHA;ACADVL;ECHS1;ACOT2;PCTP;ACAA2;HADHB;ACADM;ACOT1;ACADS
Triglyceride metabolism	down	blue	lipid metabolism	R-HSA-8979227	http://reactome.org/PathwayBrowser/#/R-HSA-8979227	37	11	2.01922	5.44764	2.7048e-06	0.000427195	11	FABP4;PLIN1;CAV1;GPAM;LIPE;FABP5;DGAT1;MGLL;ABHD5;DGAT2;LPIN1
Beta oxidation of decanoyl-CoA to octanoyl-CoA-CoA	down	blue	lipid metabolism	R-HSA-77346	http://reactome.org/PathwayBrowser/#/R-HSA-77346	6	5	0.327441	15.2699	2.72731e-06	0.000427195	5	HADH;HADHA;ECHS1;HADHB;ACADM
Phospholipid metabolism	down	blue	lipid metabolism	R-HSA-1483257	http://reactome.org/PathwayBrowser/#/R-HSA-1483257	207	27	11.2967	2.39007	2.14473e-05	0.00284259	27	PIK3R3;MTMR12;GPAM;GPD1;PNPLA2;PLA2G16;BMX;DGAT1;GPAT3;PTEN;HADHA;MGLL;AGPAT2;MTMR10;PIK3C2A;GDPD5;PCTP;CHKA;HRASLS5;DGAT2;PCYT1A;HADHB;CRLS1;LPIN1;SBF2;CEPT1;PLA2R1
Beta oxidation of lauroyl-CoA to decanoyl-CoA-CoA	down	blue	lipid metabolism	R-HSA-77310	http://reactome.org/PathwayBrowser/#/R-HSA-77310	5	4	0.272868	14.6591	4.20025e-05	0.00482468	4	HADH;HADHA;ECHS1;HADHB
Glycerophospholipid biosynthesis	down	blue	lipid metabolism	R-HSA-1483206	http://reactome.org/PathwayBrowser/#/R-HSA-1483206	126	19	6.87627	2.76313	4.94473e-05	0.00507399	19	GPAM;GPD1;PNPLA2;PLA2G16;DGAT1;GPAT3;HADHA;MGLL;AGPAT2;PCTP;CHKA;HRASLS5;DGAT2;PCYT1A;HADHB;CRLS1;LPIN1;CEPT1;PLA2R1
Triglyceride catabolism	down	blue	lipid metabolism	R-HSA-163560	http://reactome.org/PathwayBrowser/#/R-HSA-163560	24	7	1.30977	5.34447	0.000212816	0.0135808	7	FABP4;PLIN1;CAV1;LIPE;FABP5;MGLL;ABHD5
Acyl chain remodeling of DAG and TAG	down	blue	lipid metabolism	R-HSA-1482883	http://reactome.org/PathwayBrowser/#/R-HSA-1482883	7	4	0.382015	10.4708	0.000269136	0.016237	4	PNPLA2;DGAT1;MGLL;DGAT2

## Sheet: Sheet2
overlapId	overlap
10051;10112;1019;1029;10381;10403;10592;1063;10733;10926;11065;11130;113130;128312;151648;157570;2237;22974;22995;2305;23354;23649;2491;26271;3012;3017;3018;333932;4001;401541;4085;4171;4173;4174;4605;51512;51659;5347;54908;55143;55166;5558;55920;5933;5983;5984;6241;64105;6790;701;7153;723790;79019;79023;79172;79682;81930;8317;8331;8335;8337;8339;8340;8342;8343;8344;8345;8347;8349;8354;83540;8355…	97			97
10051;10112;1019;1029;10381;10403;10592;1063;10733;10926;11065;11073;1111;11130;11200;113130;116028;128312;151648;157570;2237;22974;22995;2305;23354;23649;2491;26271;3012;3017;3018;333932;4001;401541;4085;4171;4173;4174;4193;4605;51512;51659;5347;54908;55135;55143;55166;55355;5558;55920;580;5883;5888;5933;5983;5984;6241;63967;64105;65057;672;675;6790;701;7153;723790;79019;79023;79172;79682;80010;…	113			113
10051;10112;10381;10403;10592;1063;10733;11065;11130;113130;128312;151648;22995;23354;2491;26271;3012;3017;3018;333932;4001;401541;4085;5347;54908;55143;55166;55920;64105;701;723790;79019;79023;79172;79682;81930;8331;8335;8337;8339;8340;8342;8343;8344;8345;8347;8349;8354;83540;8355;8358;8360;84131;85236;891;8968;8970;9133;9212;9232;9493;95681;9662;9688;9814;983;991	67			67
10635;10721;11073;1111;11200;116028;128312;2068;2071;2176;2177;2187;2237;29089;3017;3018;51514;55775;56852;580;5883;5888;5983;5984;63967;64421;672;675;7516;80010;8339;8340;8342;8343;8344;8345;8347;8349;8360;83990;85236;890;8970;91442;9768;9937	46			46
1029;10403;1063;10926;11065;11073;1111;11130;11200;116028;128312;151648;2491;3017;3018;401541;4085;4171;4173;4174;4193;51512;5347;54908;55143;55166;55920;580;5883;5983;5984;63967;64105;672;701;79019;79023;79172;79682;80010;81930;8317;8339;8340;8342;8343;8344;8345;8347;8349;83540;8360;83990;84515;85236;890;891;8970;898;9133;9212;983;990;991;995	65			65
10926;11073;1111;11200;116028;128312;3017;3018;4171;4173;4174;51512;580;5883;5983;5984;63967;672;80010;8317;8339;8340;8342;8343;8344;8345;8347;8349;8360;83990;84515;85236;891;8970;9133;983;990;995	38			38
10635;10721;11073;1111;11200;116028;128312;2237;3017;3018;55775;580;5883;5888;5983;5984;63967;64421;672;675;7516;80010;8339;8340;8342;8343;8344;8345;8347;8349;8360;83990;85236;890;8970	35			35
128312;1786;1789;2068;2071;2146;26147;29128;3012;3017;3018;3066;333932;723790;8331;8335;8337;8339;8340;8342;8343;8344;8345;8347;8349;8354;8355;8358;8360;85236;8968;8970	32			32
128312;3012;3017;3018;317772;333932;440689;723790;8329;8330;8331;8332;8335;8336;8337;8339;8340;8342;8343;8344;8345;8347;8349;8354;8355;8358;8360;85235;85236;8968;8969;8970;92815	33			33
10051;10592;128312;3012;3017;3018;333932;4001;5347;723790;79023;8331;8335;8337;8339;8340;8342;8343;8344;8345;8347;8349;8354;8355;8358;8360;85236;891;8968;8970;9133;9688;983	33			33
10635;10721;11073;1111;116028;128312;2237;3017;3018;580;5883;5888;5983;5984;63967;672;675;7516;80010;8339;8340;8342;8343;8344;8345;8347;8349;8360;83990;85236;890;8970	32			32
10635;11073;1111;116028;128312;3017;3018;580;5883;5888;5983;5984;63967;672;675;7516;80010;8339;8340;8342;8343;8344;8345;8347;8349;8360;83990;85236;890;8970	30			30
128312;3012;3017;3018;3066;317772;333932;440689;723790;8329;8330;8331;8332;8335;8336;8337;8339;8340;8342;8343;8344;8345;8347;8349;8354;8355;8358;8360;85235;85236;8968;8969;8970;92815	34			34
128312;2237;23649;3012;3017;3018;55135;5558;5983;5984;65057;723790;8331;8335;8337;8339;8340;8342;8343;8344;8345;8347;8349;8360;85236;8970	26			26
10051;10592;128312;3012;3017;3018;333932;5347;723790;8331;8335;8337;8339;8340;8342;8343;8344;8345;8347;8349;8354;8355;8358;8360;85236;891;8968;8970;983	29			29
128312;1786;1789;2146;26147;3012;3017;3018;333932;723790;8331;8335;8337;8339;8340;8342;8343;8344;8345;8347;8349;8354;8355;8358;8360;85236;8968;8970	28			28
128312;1786;1789;29128;3012;3017;3018;333932;723790;8331;8335;8337;8339;8340;8342;8343;8344;8345;8347;8349;8354;8355;8358;8360;85236;8968;8970	27			27
10051;10381;10403;10592;1063;10733;11130;113130;151648;22995;23354;2491;401541;4085;5347;54908;55143;55166;55920;64105;701;79019;79023;79172;79682;81930;83540;84131;891;9133;9212;95681;9662;9814;983;991	36			36
11073;1111;116028;128312;3017;3018;580;5883;5983;5984;63967;672;80010;8339;8340;8342;8343;8344;8345;8347;8349;8360;83990;85236;890;8970	26			26
128312;3012;3017;3018;3066;333932;723790;8331;8335;8337;8339;8340;8342;8343;8344;8345;8347;8349;8354;8355;8358;8360;85236;8968;8970	25			25
10381;10403;1063;11130;113130;151648;2491;401541;4085;5347;54908;55143;55166;55920;64105;701;79019;79023;79172;79682;81930;83540;891;9133;9212;983;991	27			27
128312;3012;3017;3018;333932;723790;79023;8331;8335;8337;8339;8340;8342;8343;8344;8345;8347;8349;8354;8355;8358;8360;85236;8968;8970;9688	26			26
1019;128312;2146;3012;3017;3018;3066;317772;333932;440689;64754;723790;8329;8330;8331;8332;8335;8336;8337;8339;8340;8342;8343;8344;8345;8347;8349;8354;8355;8358;8360;84678;85235;85236;8968;8969;8970;92815	38			38
1019;128312;2146;3012;3017;3018;3066;317772;333932;440689;64754;723790;8329;8330;8331;8332;8335;8336;8337;8339;8340;8342;8343;8344;8345;8347;8349;8354;8355;8358;8360;84678;85235;85236;8968;8969;8970;92815	38			38
1019;3012;317772;333932;723790;8329;8330;8331;8332;8335;8336;8337;8354;8355;8358;8360;85235;8968;8969;92815	20			20
10403;1063;11065;11130;151648;2491;401541;4085;5347;54908;55143;55166;55920;64105;701;79019;79023;79172;79682;81930;83540;9212;991	23			23
128312;3017;3018;55775;580;64421;672;8339;8340;8342;8343;8344;8345;8347;8349;8360;85236;8970	18			18
10635;11073;1111;116028;580;5883;5888;5983;5984;672;675;7516;80010;83990	14			14
10381;10403;1063;11065;11130;113130;151648;2491;26271;4001;401541;4085;5347;54908;55143;55166;55920;64105;701;79019;79023;79172;79682;81930;83540;9212;9232;991	28			28
2237;23649;4171;4173;4174;51659;5558;5983;5984;84296;84515;9837	12			12
11200;128312;3017;3018;580;672;8339;8340;8342;8343;8344;8345;8347;8349;8360;85236;8970	17			17
11200;128312;3017;3018;580;672;8339;8340;8342;8343;8344;8345;8347;8349;8360;85236;8970	17			17
10381;10403;1063;11065;11130;113130;151648;2491;4001;401541;4085;5347;54908;55143;55166;55920;64105;701;79019;79023;79172;79682;81930;83540;9212;9232;991	27			27
128312;3012;3017;3018;333932;4221;6662;723790;7474;8331;8335;8337;8339;8340;8342;8343;8344;8345;8347;8349;8354;8355;8358;8360;85236;8968;8970	27			27
10635;11073;1111;116028;580;5883;5888;5983;5984;672;675;7516;80010;83990	14			14
1019;1029;10926;23649;26271;4171;4173;4174;4605;5558;5933;6241;7153;8317;84515;890;891;898;983;990	20			20
10926;11065;2237;23649;4171;4173;4174;51659;5558;5983;5984;8317;84296;84515;890;898;9837;990	18			18
1063;2305;4605;5347;891;9133;995	7			7
10769;144455;581;5933;6790;79733;890;891;898;983;995	11			11
1019;11065;113130;157570;2237;23649;4171;4173;4174;51659;5558;5983;5984;84296;84515;890;898;9837;990;994	20			20
2305;5347;890;891;9133;983;994;995	8			8
1019;10926;23649;26271;4171;4173;4174;5558;5933;6241;8317;84515;890;891;898;983;990	17			17
11065;2237;23649;4171;4173;4174;51659;5558;5983;5984;84296;84515;890;898;9837;990	16			16
10381;1063;10733;22974;22995;2305;23354;4605;51512;5347;6790;84131;890;891;9133;95681;9662;9814;983;994;995	21			21
10381;1063;10733;22974;22995;2305;23354;4605;51512;5347;6790;84131;890;891;9133;95681;9662;9814;983;994;995	21			21
128312;2786;3012;3017;3018;333932;4221;6662;723790;7474;8331;8335;8337;8339;8340;8342;8343;8344;8345;8347;8349;8354;8355;8358;8360;85236;8968;8970	28			28
10051;10592;891;9133;983	5			5
4605;5933;7153;890;898;983;990	7			7
11065;26271;4085;5347;6790;701;890;891;9212;9232;983;991	12			12
10733;22974;22995;23354;5347;6790;84131;95681;9662;9814;983	11			11
10733;22995;23354;5347;6790;84131;891;9133;95681;9662;9814;983	12			12
26271;5933;6241;898;983;990	6			6
26271;5933;6241;898;983;990	6			6
891;9133;983	3			3
2237;23649;55135;5558;5983;5984	6			6
23649;5558;84515;891;983	5			5
2237;23649;5558;5983;5984	5			5
11065;26271;4085;5347;701;890;891;983;991	9			9
10733;22995;23354;5347;84131;95681;9662;9814;983	9			9
2146;333932;64754;8354;8355;8358;8360;8968	8			8
10926;23649;4171;4173;4174;5558;8317;84515;990	9			9
84515;891;983	3			3
10449;10965;11001;1545;1580;1892;2180;2194;23417;3030;3032;3033;32;3295;34;35;37;51422;51703;58488;6319;641371;7069;788;7923;79993;8644;91452	28			28
10087;10390;10449;10555;10965;11001;11145;1119;11343;114876;1149;117245;123;1545;1580;1645;1646;1892;2167;2171;2180;2194;22925;23175;23344;23417;2819;3030;3032;3033;32;3295;34;340485;35;37;38;3991;427;50486;51099;51129;5130;51422;51703;5286;5346;54545;54675;5468;54893;55331;57104;5728;57678;58488;6319;63924;641371;660;7069;7108;788;7923;79993;81544;81846;84649;84803;8503;857;8644;8694;91452;94103…	77			77
1892;3030;3032;3033;34;35;37	7			7
1892;3030;3032;3033;34	5			5
1892;3030;3032;3033;35	5			5
10449;10965;1892;3030;3032;3033;34;35;37;58488;641371	11			11
11343;2167;2171;23175;3991;51099;5346;57678;84649;857;8694	11			11
1892;3030;3032;3033;34	5			5
10390;10555;11145;1119;11343;117245;22925;23175;2819;3030;3032;5130;5286;54545;54675;54893;57104;5728;57678;58488;660;81544;81846;84649;84803;8503;8694	27			27
1892;3030;3032;3033	4			4
10390;10555;11145;1119;11343;117245;22925;23175;2819;3030;3032;5130;54675;57104;57678;58488;84649;84803;8694	19			19
11343;2167;2171;3991;51099;5346;857	7			7
11343;57104;84649;8694	4			4
